# Supplementary material for: The Association between Environmental Factors and Scarlet Fever Incidence in Beijing Region: Using GIS and Spatial Regression Models
Source: MDPI journal article supplement (doi:10.3390/ijerph13111083), 2016-11-04
Supplement: s1 [file s1]

# Supplementary Materials: The Association between Environmental Factors and Scarlet Fever Incidence in Beijing Region: Using GIS and Spatial Regression Models

Gehendra Mahara, Chao Wang, Kun Yang, Sipeng Chen, Jin Guo, Qi Gao, Wei Wang, Quanyi Wang and Xiuhua Guo

## (A) Rook's Weight

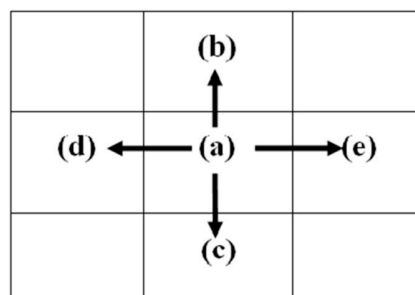

## (B) Queens's Weight

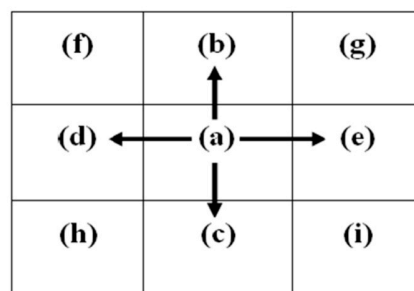

**Figure S1.** Spatial contiguity weights: Rooks and Queens: (A) Rook's Weight; (B) Queens's Weight.

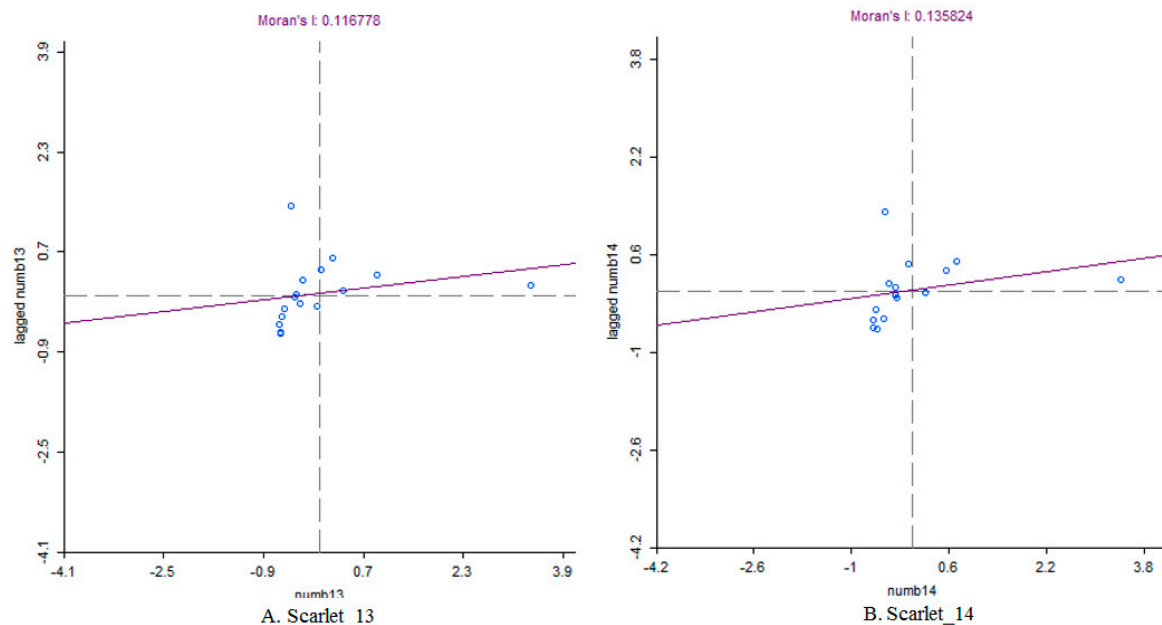

**Figure S2.** Global Moran's Spatial Autocorrelation Analysis of Scarlet Fever in Beijing-2013 and 2014. X-axis standardized for the each geographic object, where the Y-axis represents the mean standardized neighbor value, and points for various locations are based on the "High-high (H-H)/Low-Low (L-H)" classification scheme. Because the data are Z-scores, the raw data have been standardized so that its mean value is zero. (0, 0) is the value of the cross-hairs of the graph. The values in the graph correspond to standard deviations and the slope of the best-fit (regression) line through the points are proportional to the global Moran's  $I$  for the 6 dataset. The Moran's  $I$  value and significance can be also found in the log output.

**Table S1.** Results of tests to determine specific fixed effects and spatial dependency.

| Type of Test     | Test to Determine the Inclusion of the Model with Spatially Lagged or Spatial Error Auto Correlated Term |          |                 |            |                   |
|------------------|----------------------------------------------------------------------------------------------------------|----------|-----------------|------------|-------------------|
|                  | LM (SARMA)                                                                                               | LM (lag) | Robust LM (Lag) | LM (Error) | Robust LM (Error) |
| Statistics Value | 7.5708                                                                                                   | 8.7043   | 7.5618          | 0.0089     | 5.9850            |
| $p$ -Value       | 0.0027                                                                                                   | 0.00317  | 0.00596         | 0.0002     | 0.0014            |

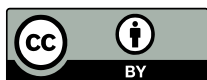

© 2016 by the authors. Submitted for possible open access publication under the terms and conditions of the Creative Commons Attribution (CC-BY) license (<http://creativecommons.org/licenses/by/4.0/>).
